# Supplementary material for: Regulating Li-ion flux with a high-dielectric hybrid artificial SEI for stable Li metal anodes
Source: Royal Society of Chemistry journal article supplement (doi:10.1039/d2nr01097f), 2022-01-01
Supplement: d2nr01097f1.pdf [file d2nr01097f1.pdf]

## Supplementary Data

### Regulating Li-ion flux with high-dielectric hybrid artificial SEI for stable Li metal anode

Xiangru Sun,<sup>‡a</sup> Shaohua Yang,<sup>‡c</sup> Ting Zhang,<sup>d</sup> Yanbin Shi,<sup>a</sup> Lei Dong,<sup>a</sup> Guo Ai,<sup>a\*</sup>

Dejun Li,<sup>a\*</sup> Wenfeng Mao<sup>b\*</sup>

*a Tianjin International Joint Research Centre of Surface Technology for Energy  
Storage Materials, College of Physics and Materials Science, Tianjin Normal  
University, Tianjin 300387, China.*

*b Tianjin Key Laboratory of Structure and Performance for Functional  
Molecules, College of Chemistry, Tianjin Normal University, Tianjin 300387, China*

*c Science and Technology on Reliability Physics and Application of Electronic  
Component Laboratory, No. 5 Electronic Research Institute of the Ministry of  
Industry and Information Technology, Guangzhou 510610, China*

*d Department of physics, Hong Kong University of Science and Technology,  
Clear Water Bay, Kowloon 999077, Hongkong, China*

---

\* Corresponding author:

Prof. Guo Ai, E-mail: aiguo\_pku@163.com;

Prof. Dejun Li, Email: dli1961@126.com;

Prof. Wenfeng Mao, E-mail: wenfengmao123@gmail.com;

<sup>‡</sup> These authors contribute equally to this work.

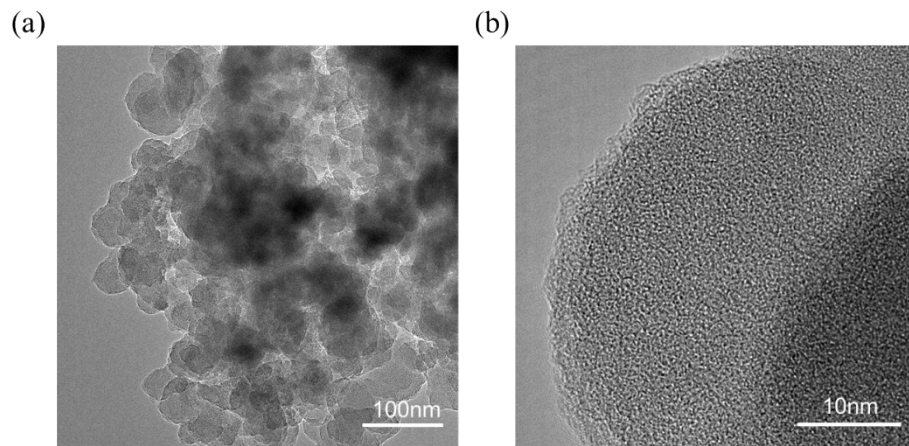

**Fig S1.** TEM images of 30 nm SiO<sub>2</sub> on the scale of (a) 100nm and (b) 10 nm.

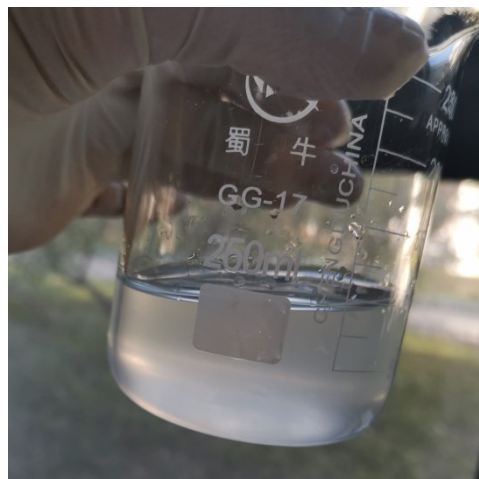

**Fig S2.** The uniform dispersion of SiO<sub>2</sub> nanoparticles within the buffer solution.

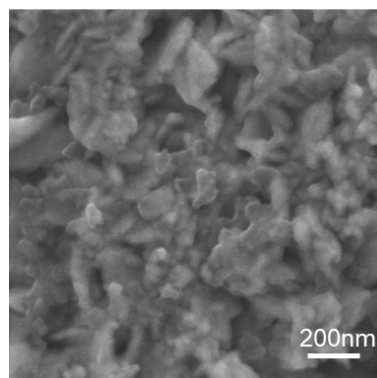

**Fig S3.** SEM image of the SiO<sub>2</sub>@PDA overlayer.

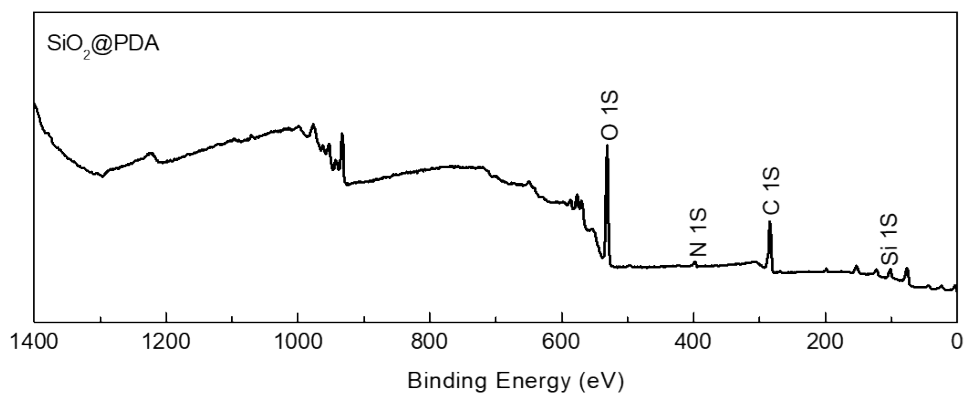

**Fig S4.** The full XPS spectra of SiO<sub>2</sub>@PDA film.

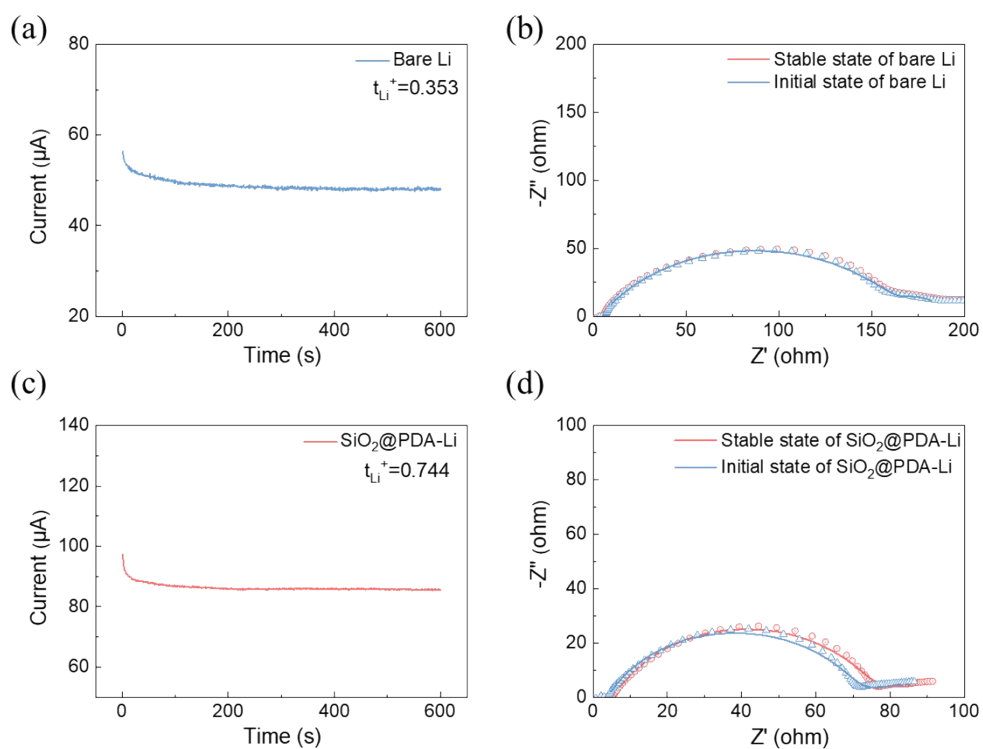

**Fig S5.** (a) Current relaxation at 10 mV polarization of a symmetric lithium cells with bare Li and (c) for SiO<sub>2</sub>@PDA-Li; (b) Nyquist plots of initial state and stable state for bare Li and (d) for SiO<sub>2</sub>@PDA-Li.

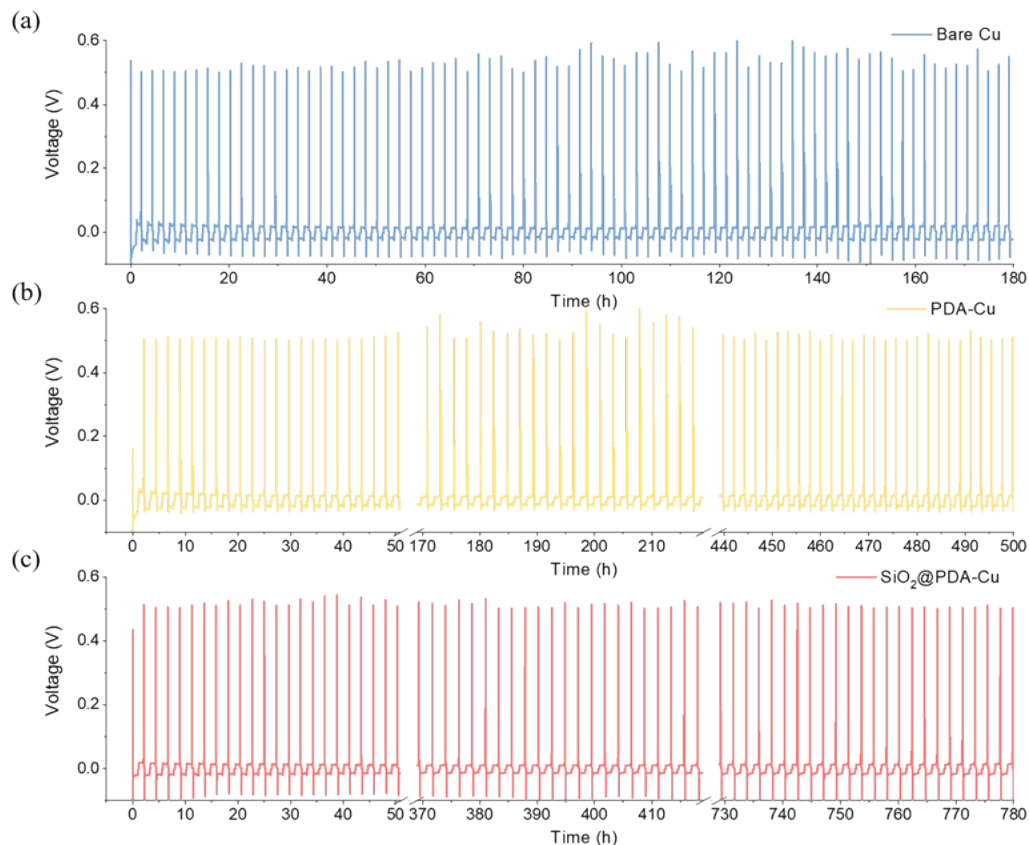

**Fig S6.** Li||Cu half-cells assembled with Bare Cu foils (a), PDA-Cu (b), and SiO<sub>2</sub>@PDA-Cu (c) with the voltage profiles of undergoing full plate-strip tests at current densities of 0.4 mA cm<sup>-2</sup> with area capacity of 0.4 mAh cm<sup>-2</sup>.

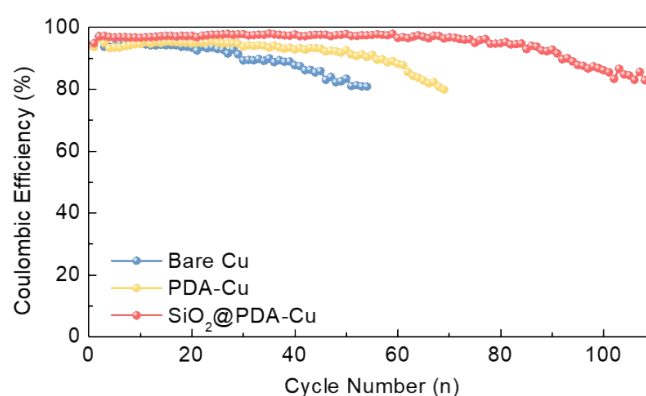

**Fig S7.** Coulombic efficiency of Li||Cu half-cells at current density at 0.8 mA cm<sup>-2</sup> with area capacity of 0.8 mAh cm<sup>-2</sup>.

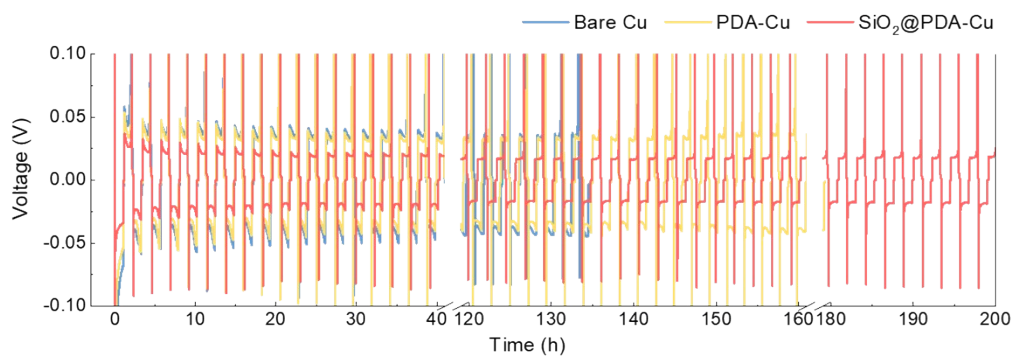

**Fig S8.** The voltage profiles of three Li||Cu half-cells undergoing full plate-strip tests at current densities of  $0.8 \text{ mA cm}^{-2}$  with area capacity of  $0.8 \text{ mAh cm}^{-2}$ .

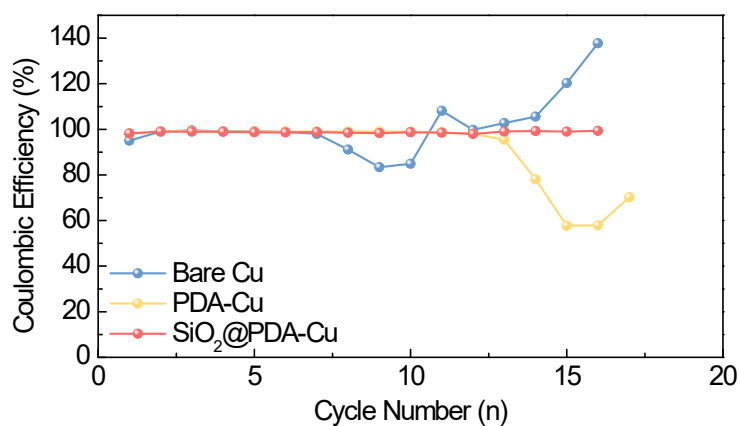

**Fig S9.** Coulombic efficiency of Li||Cu half-cells at current density at  $0.8 \text{ mA cm}^{-2}$  with area capacity of  $6 \text{ mAh cm}^{-2}$ .

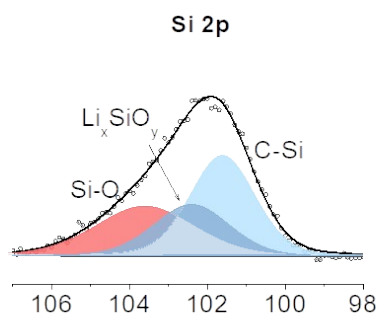

**Fig S10.** Si 2p XPS spectra of  $\text{SiO}_2\text{@PDA-SEI}$ .

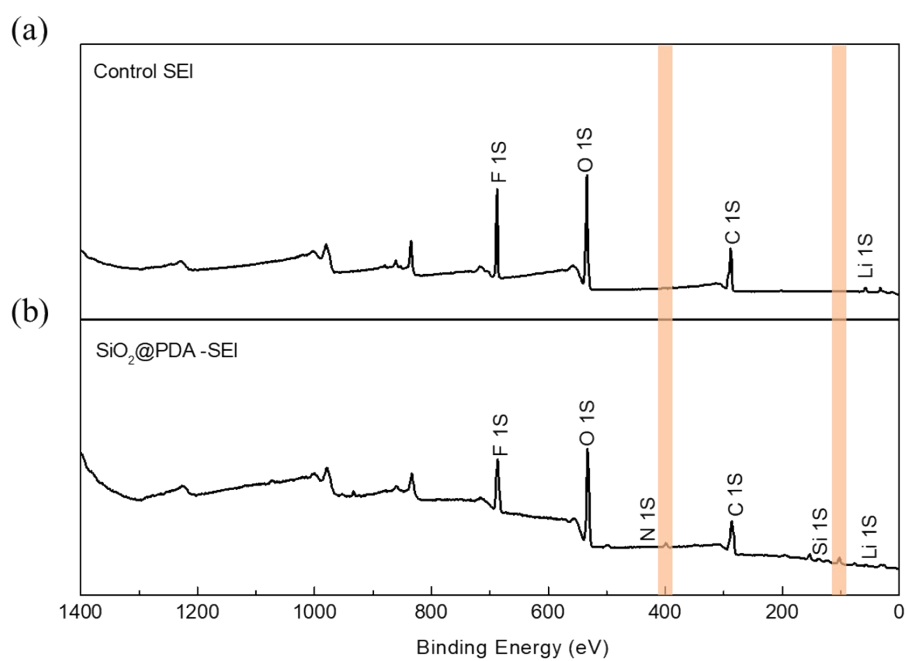

**Fig S11.** The full XPS spectra of (a) control SEI and (b) SiO<sub>2</sub>@PDA-SEI.

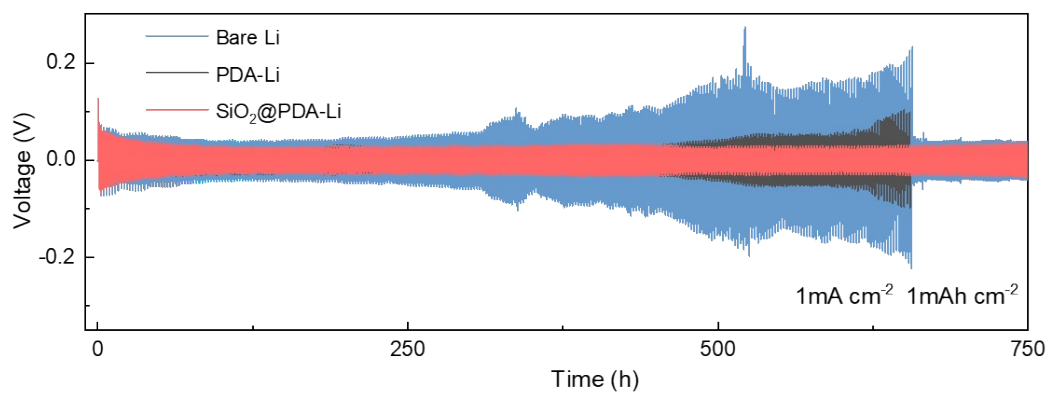

**Fig S12.** Voltage–time profiles of Li||Li cells with and without SiO<sub>2</sub>@PDA overlayer at 1 mA cm<sup>-2</sup>, 1 mAh cm<sup>-2</sup>.

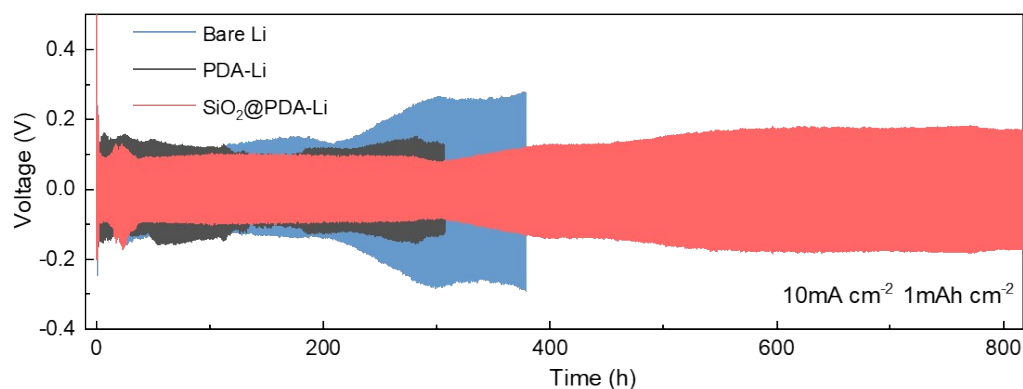

**Fig S13.** Voltage–time profiles of Li||Li cells with and without SiO<sub>2</sub>@PDA overlayer at 10 mA cm<sup>-2</sup>, 1 mAh cm<sup>-2</sup>.

**Table S1.** Cyclic stability comparison of the SiO<sub>2</sub>@PDA film with previous works

| Strategies of Li anode                                    | Current density (mA cm <sup>-2</sup> ) | Areal capacity (mAh cm <sup>-2</sup> ) | Cycle time (h) | References |
|-----------------------------------------------------------|----------------------------------------|----------------------------------------|----------------|------------|
| PVDF-HFP/LiF film                                         | 1                                      | 1                                      | 200            | 44         |
| Li-11 wt% Sr alloy anode and SrF <sub>2</sub> -rich SEI   | 1                                      | 1                                      | 280            | 42         |
| PPSP layer                                                | 1                                      | 1                                      | 320            | 40         |
| COF-based artificial SEI layer                            | 1                                      | 1                                      | 400            | 45         |
| C <sub>6</sub> F <sub>3</sub> LiN <sub>4</sub> adjust SEI | 1                                      | 1                                      | 700            | 37         |
| Polymer of intrinsic microporosity (PIM)                  | 1                                      | 1                                      | 720            | 41         |
| 3D structural network of GFs layer                        | 1                                      | 1                                      | 800            | 46         |
| hybrid poly urea (HPU) film                               | 5                                      | 1                                      | 90             | 39         |
| nano-AlPO <sub>4</sub> /PVDF-HFP composite film (PAF)     | 5                                      | 1                                      | 200            | 43         |
| LiPEO–UPy coating                                         | 5                                      | 1                                      | 2000           | 38         |
| q-PET nonwoven fabric film                                | 10                                     | 1                                      | 100            | 17         |
| Li-11 wt% Sr alloy anode and SrF <sub>2</sub> -rich SEI   | 10                                     | 1                                      | 200            | 42         |
| SiO <sub>2</sub> @PDA hybrid film                         | 1                                      | 1                                      | Over 750       | This work  |
|                                                           | 5                                      | 1                                      | 2800           |            |
|                                                           | 10                                     | 1                                      | 800            |            |
